# Supplementary material for: Bioactive Composite Methacrylated Gellan Gum for 3D-Printed Bone Tissue-Engineered Scaffolds
Source: Nanomaterials (Basel). 2023 Feb 19;13(4):772. doi: 10.3390/nano13040772 (PMC9963483; doi:10.3390/nano13040772)
Supplement: Supplementary file 1 [file nanomaterials-13-00772-s001.zip › nanomaterials-2197237-supplementary.pdf]

## Bioactive Composite Methacrylated Gellan Gum for 3D-Printed Bone Tissue-Engineered Scaffolds

Ugo D'Amora <sup>1,\*†</sup>, Alfredo Ronca <sup>1,\*†</sup>, Stefania Scialla <sup>1</sup>, Alessandra Soriente <sup>1</sup>, Paola Manini <sup>2,3</sup>, Jun Wei Phua <sup>4</sup>, Christoph Ottenheim <sup>4</sup>, Alessandro Pezzella <sup>1,3,5</sup>, Giovanna Calabrese <sup>6</sup>, Maria Grazia Raucchi <sup>1,3</sup> and Luigi Ambrosio <sup>1</sup>

<sup>1</sup> Institute of Polymers, Composites and Biomaterials, National Research Council, Naples 80125, Italy

<sup>2</sup> Department of Chemical Sciences, University of Naples Federico II, Naples 80126, Italy

<sup>3</sup> Bioelectronics Task Force, University of Naples "Federico II", Naples 80126, Italy

<sup>4</sup> Insecta, 60 Jalan Penjara, Singapore 149375, Singapore

<sup>5</sup> Department of Physics "E. Pancini", University of Naples Federico II, Naples 80126, Italy

<sup>6</sup> Department of Chemical, Biological, Pharmaceutical and Environmental Sciences, University of Messina, Messina 98168, Italy

\* Correspondence: ugo.damora@cnr.it (U.D.); alfredo.ronca@cnr.it (A.R.)

†These authors equally contributed to this work

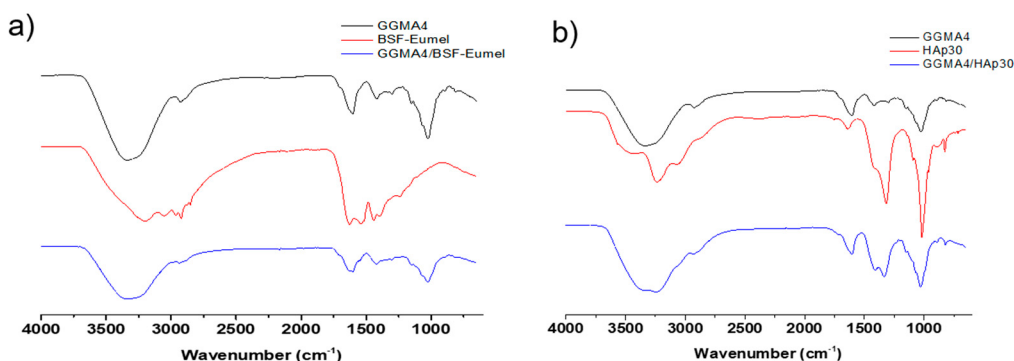

**Figure S1.** ATR-FTIR spectra of: a) GGMA4, BSF-Eumel and GGMA4/BSF-Eumel, b) GGMA4, HAp30 and GGMA4/HAp30.
